# Supplementary material for: Learning to Share Health Care Data: A Brief Timeline of Influential Common Data Models and Distributed Health Data Networks in U.S. Health Care Research
Source: PubMed Central journal article supplement (PMC6437693; doi:10.5334/egems.279), 2019-03-25

Appendix B: A Timeline of Shared or Distributed Data Networks

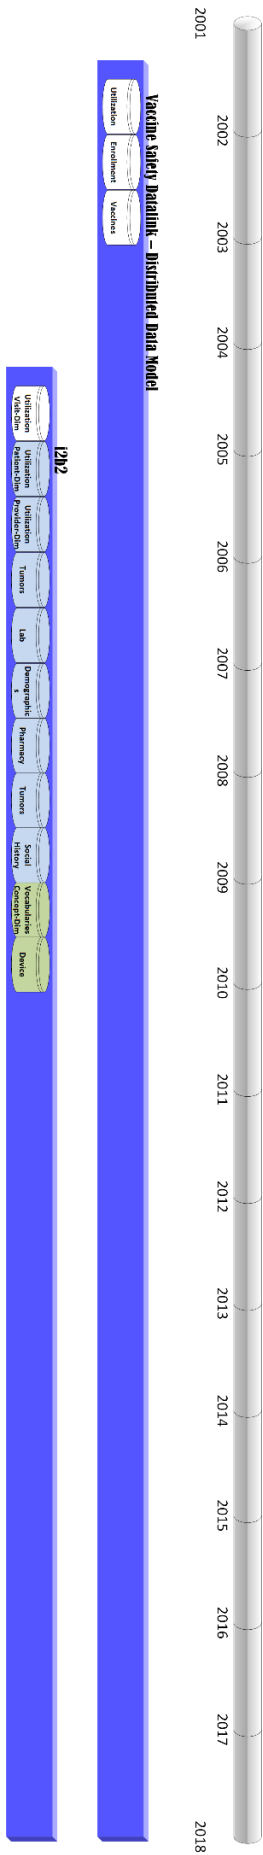

Supplement: egems-7-1-279-s2.pdf [file egems-7-1-279-s2.pdf]
